# Supplementary material for: The quantitative significance of Syntrophaceae and syntrophic partnerships in methanogenic degradation of crude oil alkanes
Source: PubMed Central journal article supplement (PMC3258425; doi:10.1111/j.1462-2920.2011.02570.x), 2011-11
Supplement: emi0013-2957-SD2.pdf [file emi0013-2957-SD2.pdf]

# Gray et al. supplementary Figure S2

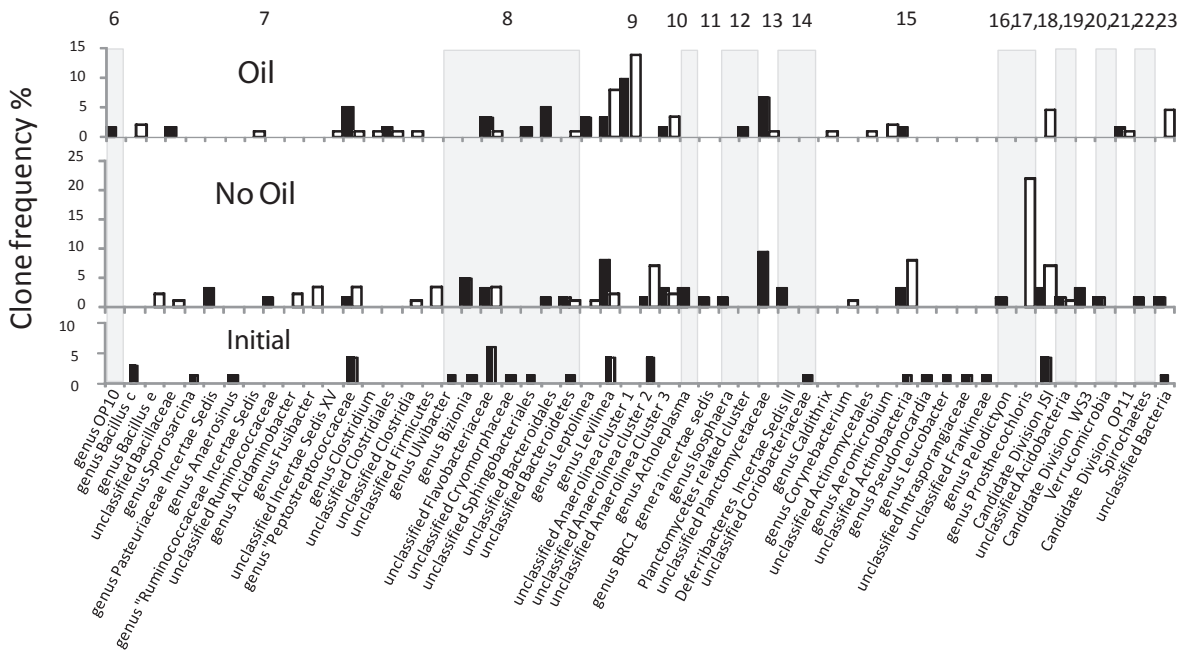

1 op10, 2 Firmicutes, 3 Bacteroidetes, 4 Chloroflexi, 5 Tenericutes, 6 BRC1, 7 Planctomycetes, 8 Planctomycetes-related cluster, 9 Deferribacteres, 10 Actinobacteria, 11 Chlorobi, 12 J51, 13 Acidobacterium, 14 candidate division WS3, 15 Verrucomicrobia, 16 candidate division OP11, 17 Spirocheata, 18 unclassified bacteria
