# Supplementary material for: The quantitative significance of Syntrophaceae and syntrophic partnerships in methanogenic degradation of crude oil alkanes
Source: PubMed Central journal article supplement (PMC3258425; doi:10.1111/j.1462-2920.2011.02570.x), 2011-11

# Gray et al. supplementary Figure S3

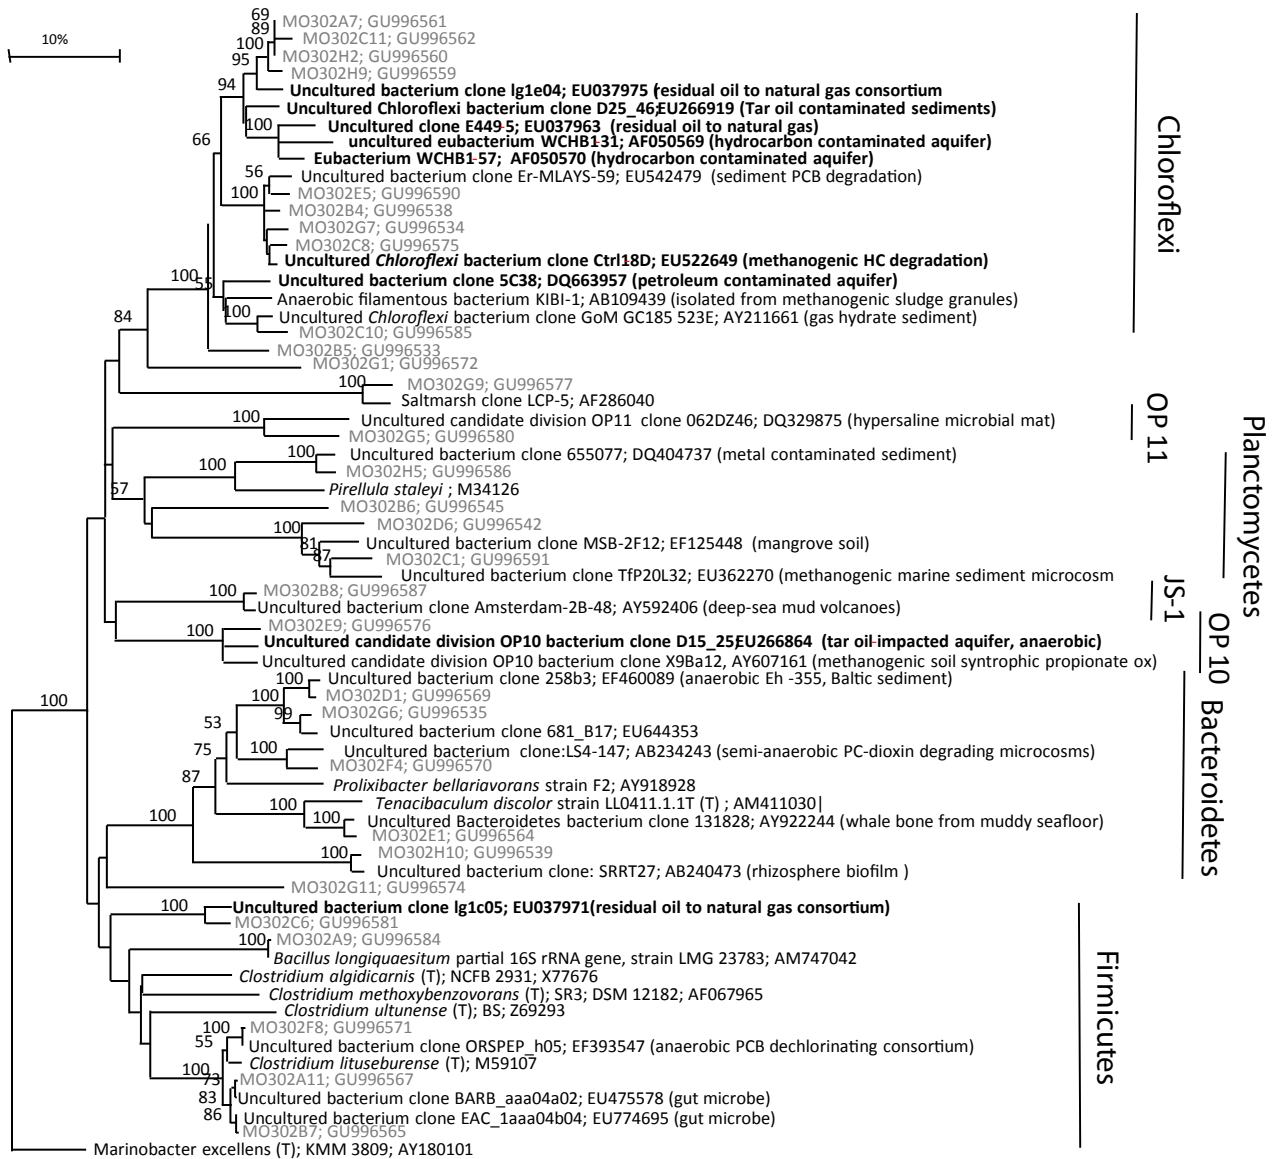

Supplement: emi0013-2957-SD3.pdf [file emi0013-2957-SD3.pdf]
